# Supplementary material for: Enhancement of multilayer lithium storage in a β12-borophene/graphene heterostructure with built-in dipoles
Source: Royal Society of Chemistry journal article supplement (doi:10.1039/d3cp05319a), 2023-12-23
Supplement: d3cp05319a1.pdf [file d3cp05319a1.pdf]

**Supporting Information for “Enhancement of multilayer lithium storage in a  $\beta_{12}$ -borophene/graphene heterostructure with built-in dipoles”**

Xiaowei Jiang, Wenjun Tang, Xiaobin Niu, Haiyuan Chen\*

School of Materials and Energy, University of Electronic Science and Technology of China,  
Chengdu 611731, China

Corresponding author: [hychen@uestc.edu.cn](mailto:hychen@uestc.edu.cn)

Table S1. The mismatch degree and binding energy of selected 6 structures.

| borophene                   | $\delta_3$ | $\chi_3$ | $\beta_{12}$   | $\chi_6$ | $\alpha$ -sheet | $\alpha_8$ |
|-----------------------------|------------|----------|----------------|----------|-----------------|------------|
| mismatch                    | 4.77%      | 2.55%    | 2.55%<br>3.06% | 0.295%   | 2.64%<br>2.67%  | 0.30%      |
| binding energy<br>(eV/atom) | -0.0949    | -0.0919  | -0.0948        | -0.0423  | -0.0608         | -0.0422    |

Table S2. Adsorption energy of Li on the surface of borophene.

|        | Adsorption site | $E_{ad}/eV$ |
|--------|-----------------|-------------|
| Li/B/G | H1              | -1.50       |
|        | H2              | -1.50       |
|        | T1              | -0.75       |
|        | T2              | -0.74       |
|        | B1              | -0.77       |
|        | B2              | -0.77       |
|        | B3              | -1.00       |

Table S3. Adsorption energy of Li on the interlayer of B/G heterostructure.

|        | Adsorption site | $E_{ad}/eV$ |
|--------|-----------------|-------------|
| B/Li/G | H1              | -1.62       |
|        | H2              | -1.54       |
|        | H3              | -0.86       |
|        | T1              | -0.99       |
|        | B1              | -1.02       |
|        | B2              | -1.27       |

Table S4. Adsorption energy of Li on the surface of graphene.

|        | Adsorption site | $E_{ad}/eV$ |
|--------|-----------------|-------------|
| B/G/Li | H1              | -0.03       |
|        | H2              | -0.04       |
|        | H3              | -0.04       |
|        | H4              | -0.03       |
|        | H5              | -0.03       |

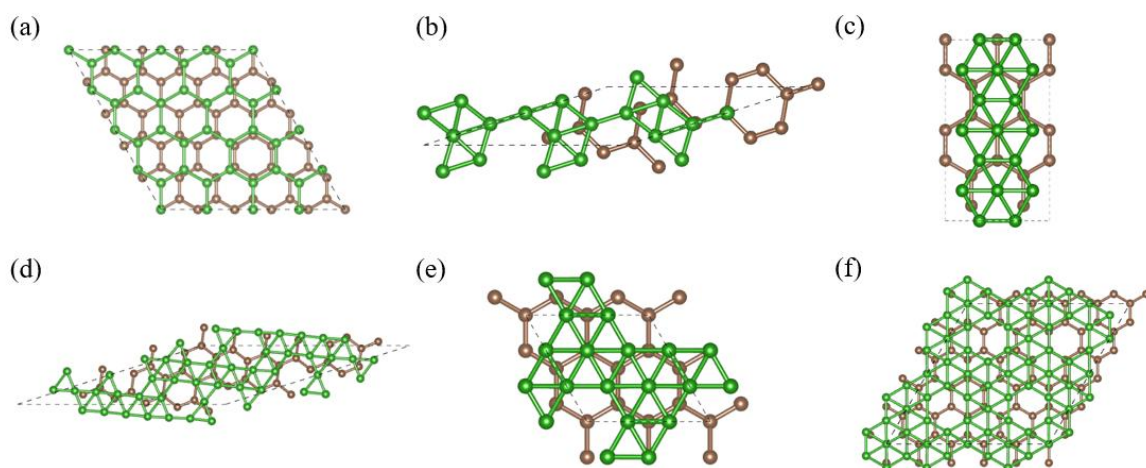

Fig. S1 The atomic configurations of (a)  $\delta_3$ -B/G, (b)  $\chi_3$ -B/G, (c)  $\beta_{12}$ -B/G, (d)  $\chi_6$ -B/G, (e)  $\alpha$ -sheet-B/G, and (f)  $\alpha_8$ -B/G heterostructure.

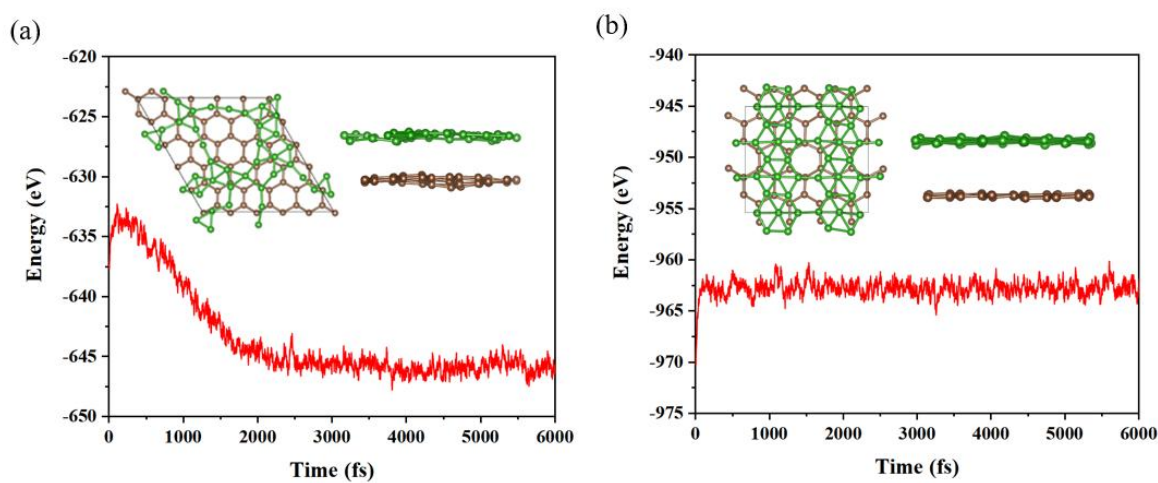

Fig. S2 The free energy of (a)  $\delta_3$ -B/G and (b)  $\beta_{12}$ -B/G heterostructure by ab initio molecular dynamics (AIMD) at 300 K. Each inset is the final snap shot of AIMD simulation.

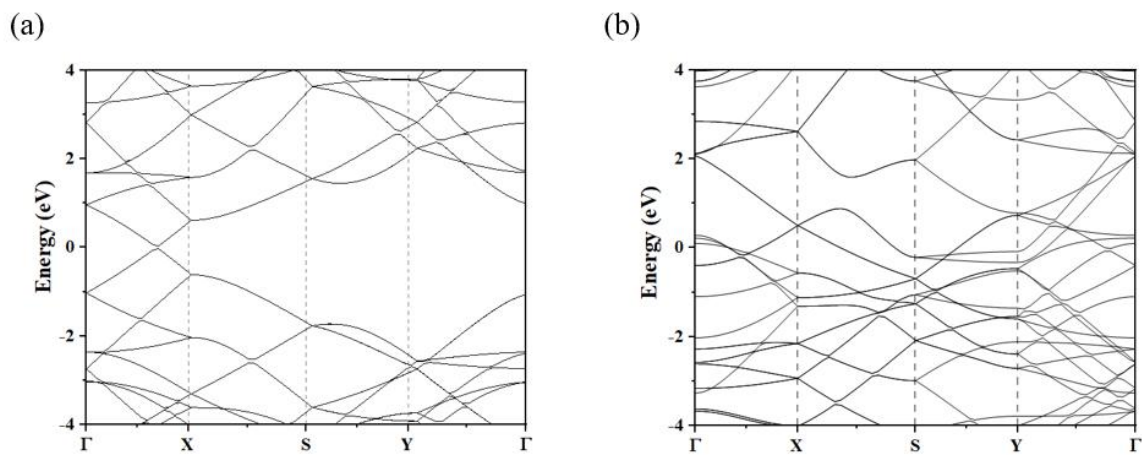

Fig. S3 The band structures of (a) monolayer borophene and (b) monolayer graphene.

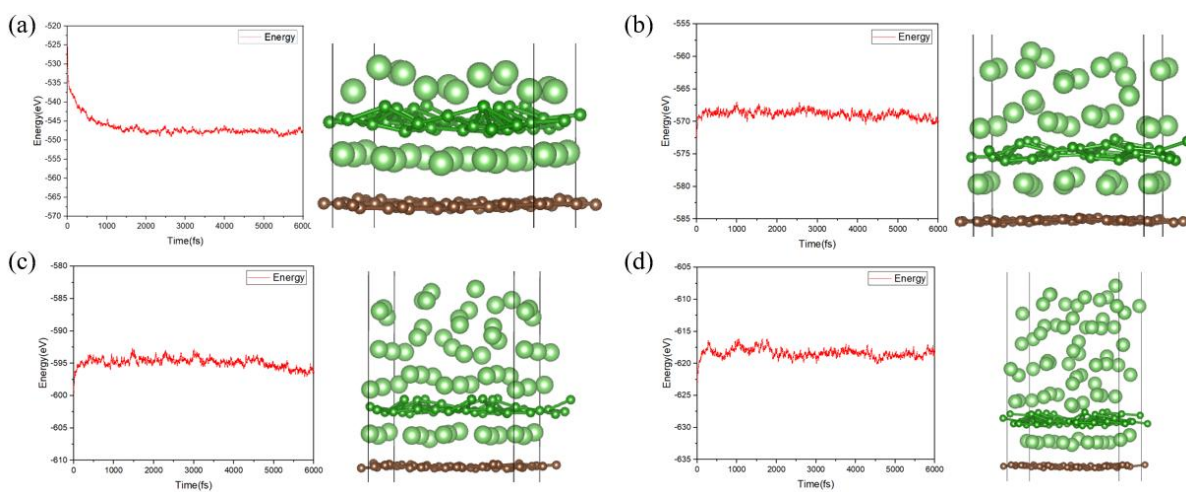

Fig. S4 The free energy of B/G heterostructure with (a) 3-layers, (b) 5-layers, (c) 7-layers, and (d) 9-layers lithium adsorption by AIMD simulation at 300 K.
